# Supplementary material
Source: publisher figshare collection journal article supplement (https://sage.figshare.com/ndownloader/files/24026927)
Supplement: Supplementary file 1 [file 24026927]

## Supplementary Data

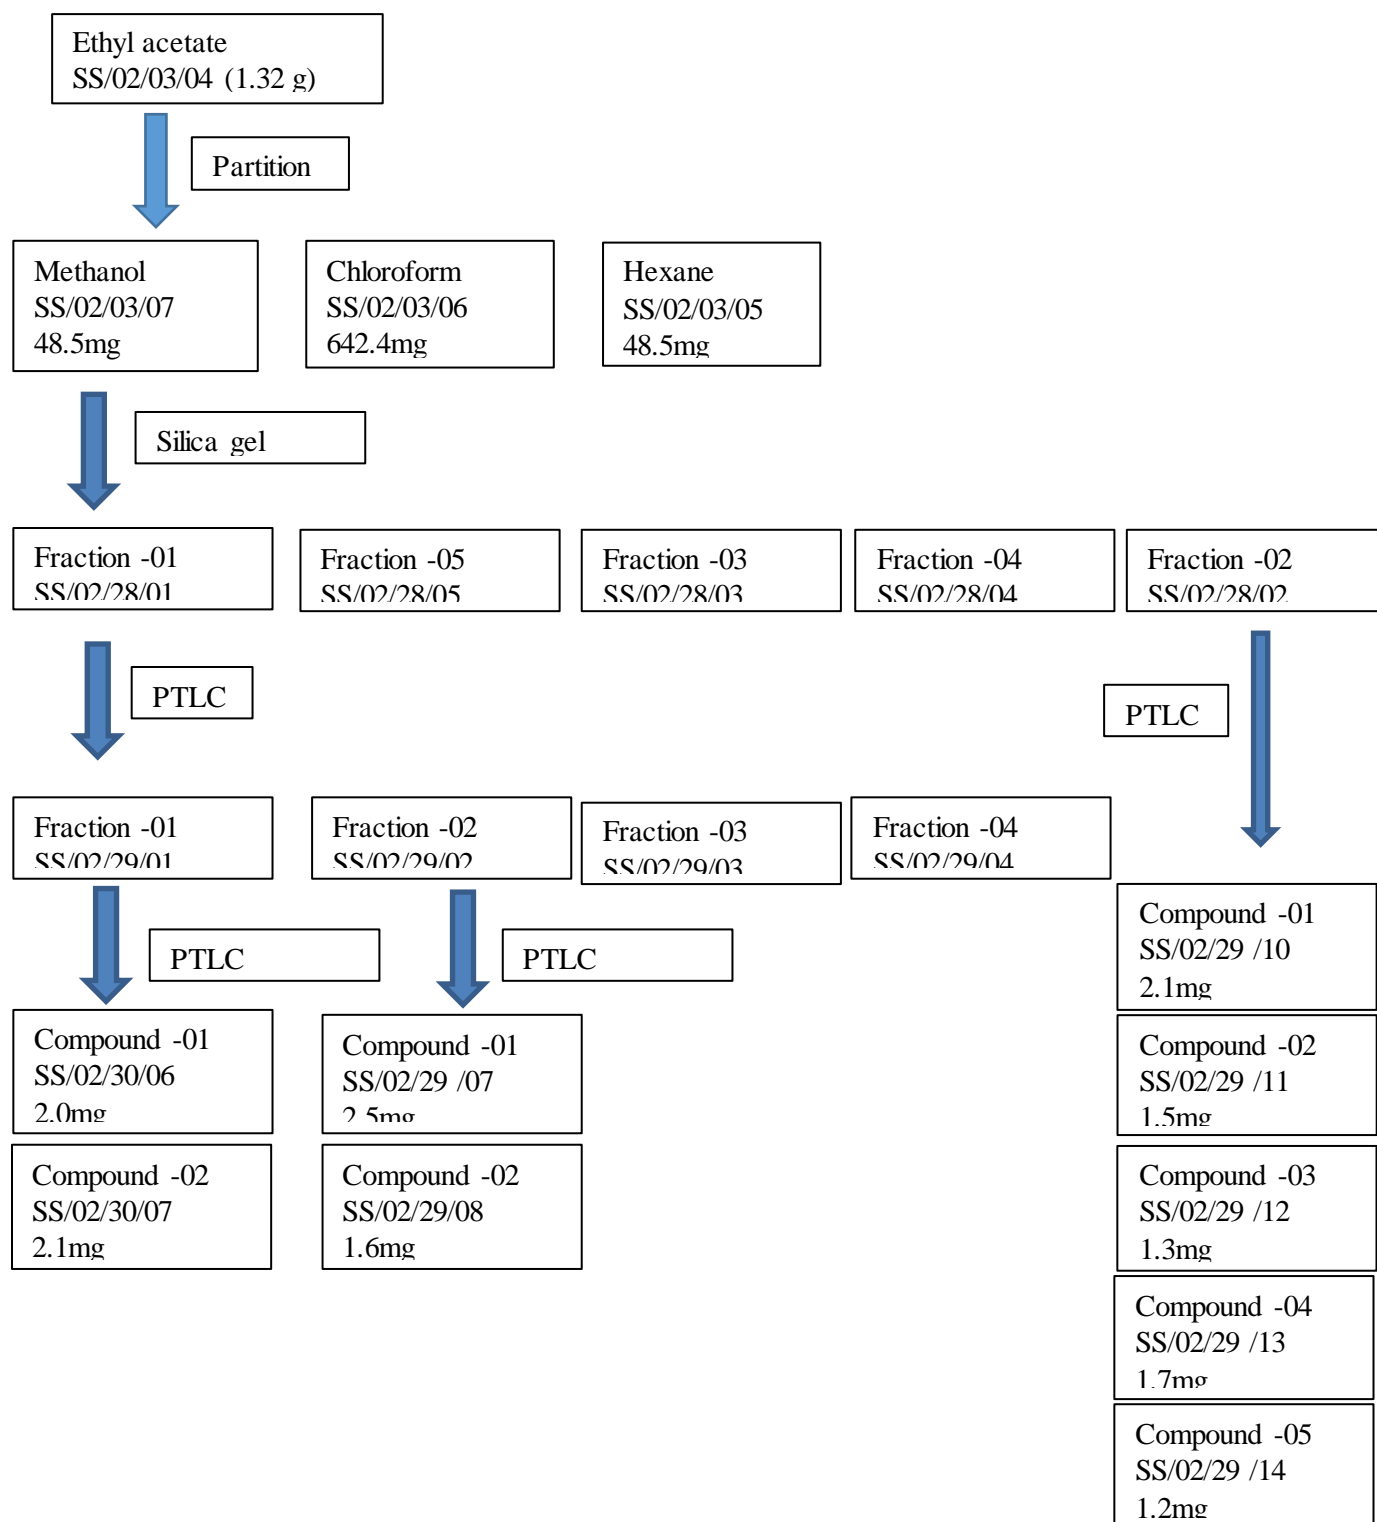

Figure S1: Isolation scheme of secondary metabolites of *X. psidii* to EtOAc (crude extract) and from the methanol fraction (SS/02/03/07) of the crude EtOAc extract

Figure S2 :

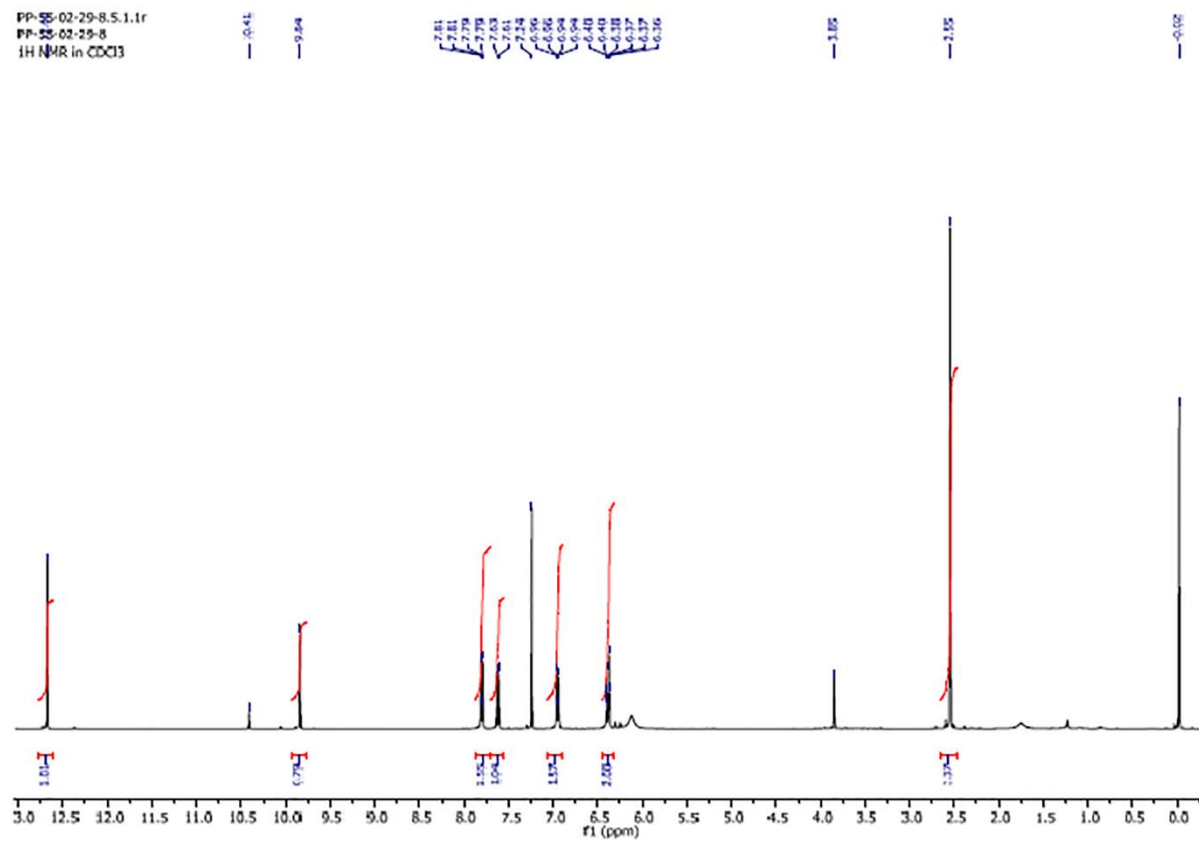

Figure S3: <sup>1</sup>H NMR of Compound 1

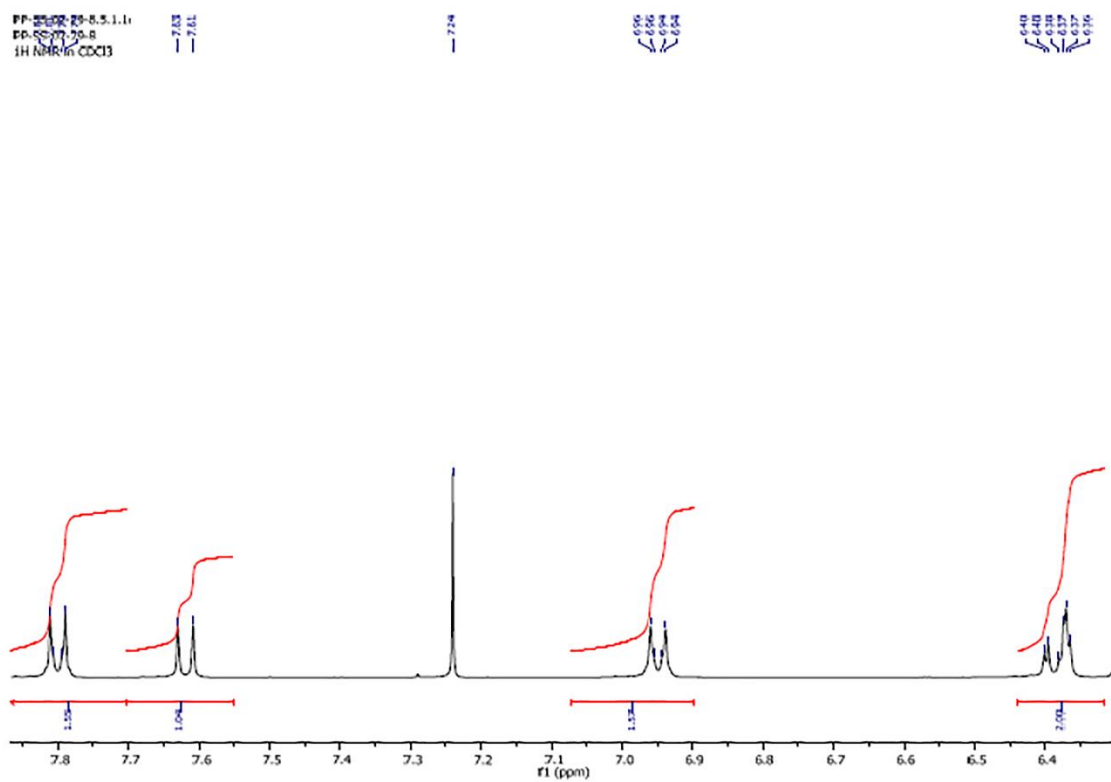

Figure S4:  $^1\text{H}$  NMR of Compound 1

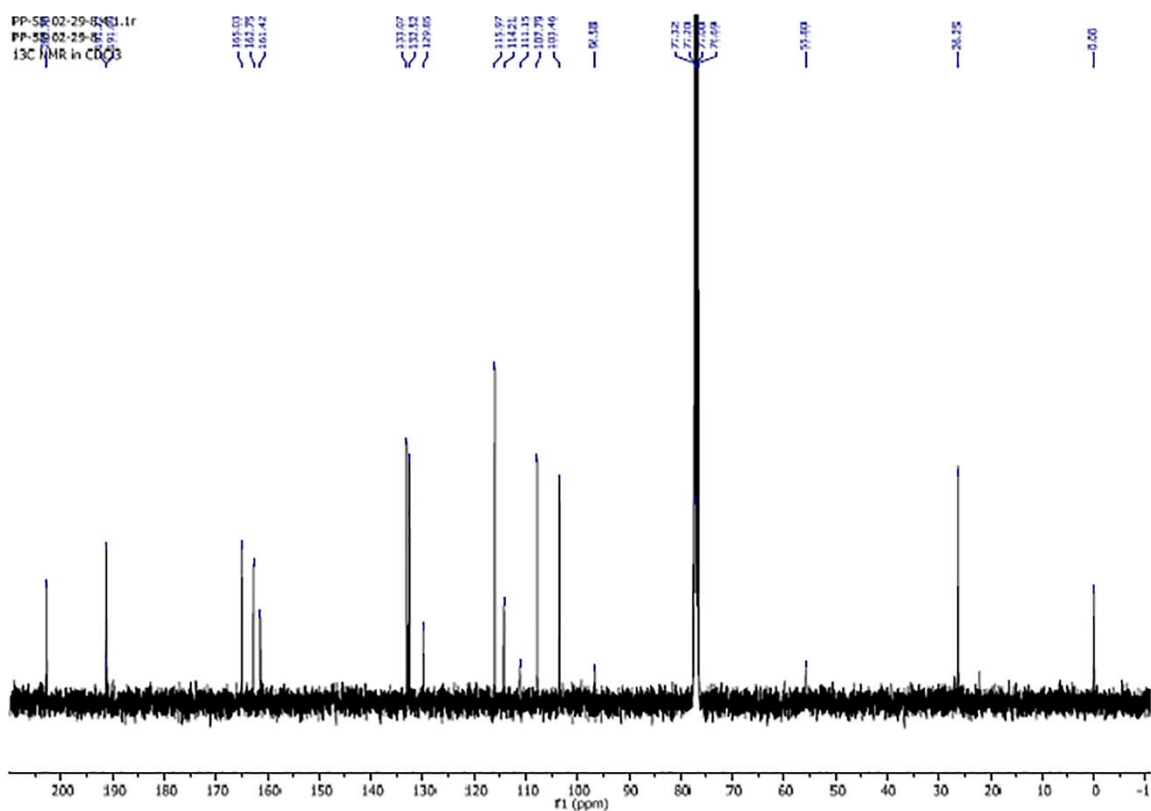

Figure S5: <sup>13</sup>C NMR of Compound 1



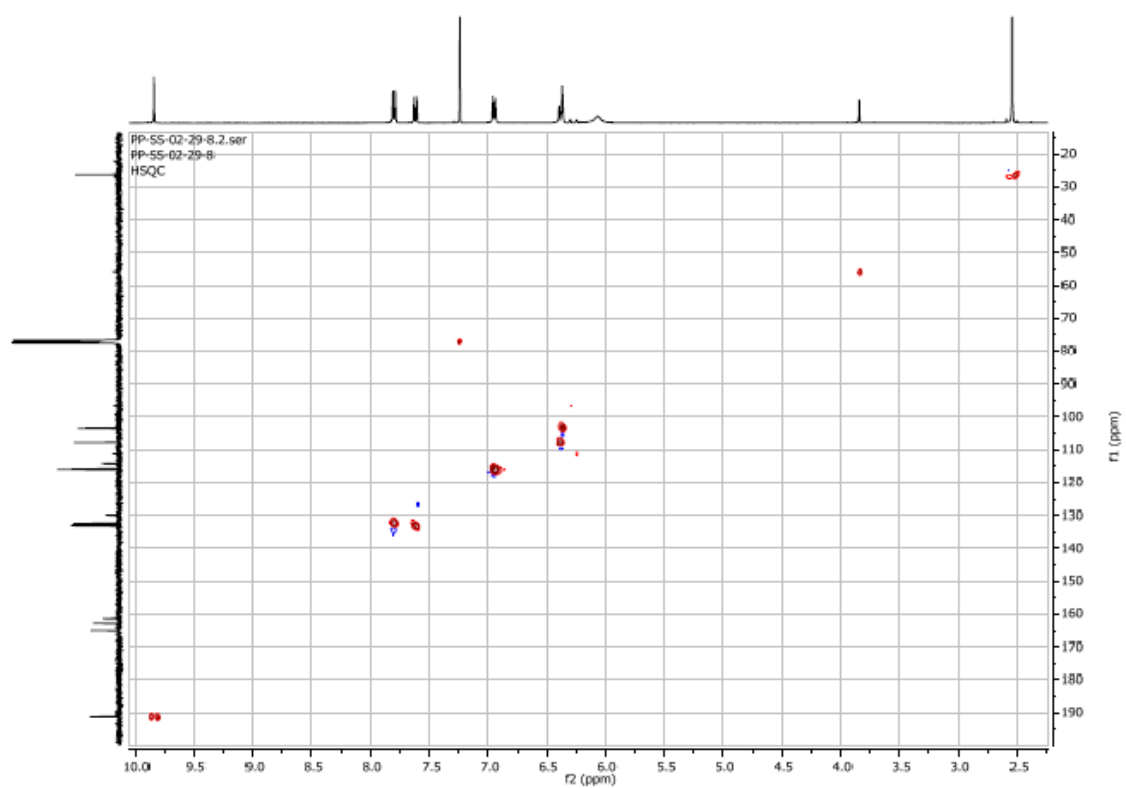

Figure S7: HSQC spectrum of Compound 1

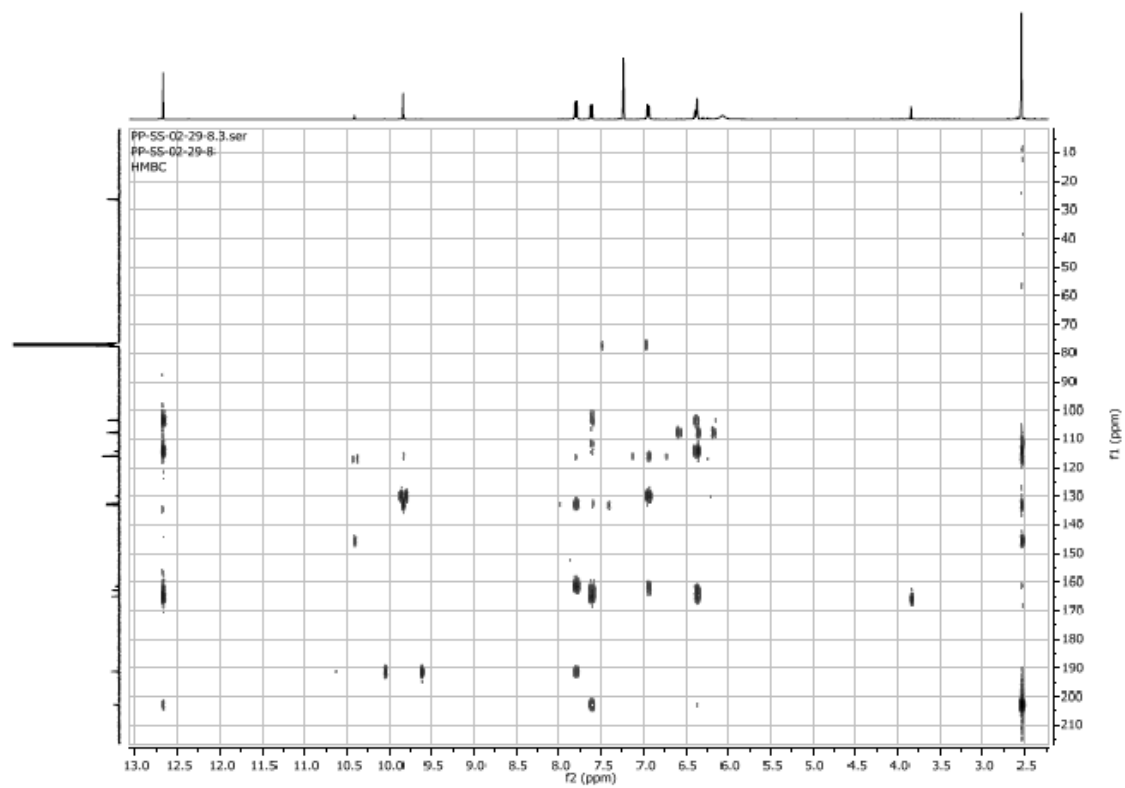

Figure S8: HMBC spectrum of Compound 1

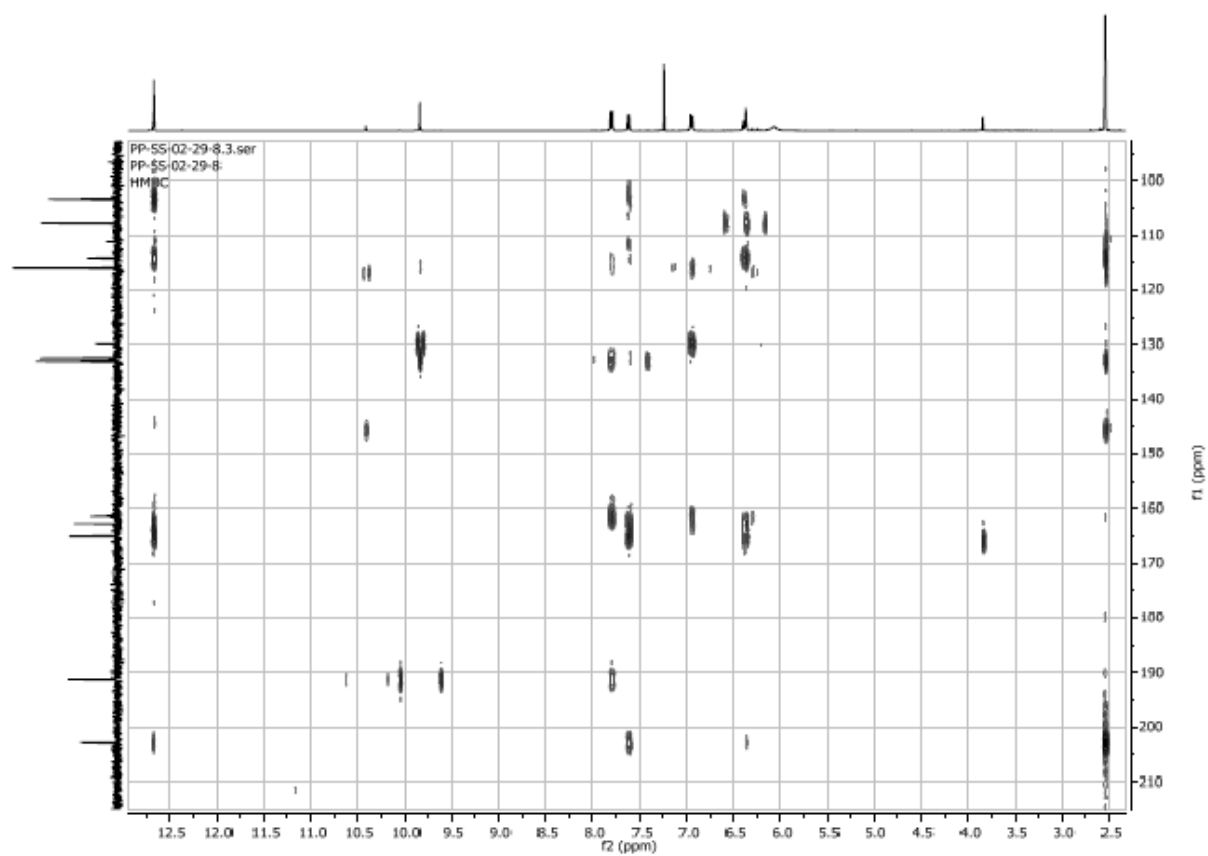

Figure S9: HMBC spectrum of Compound 1



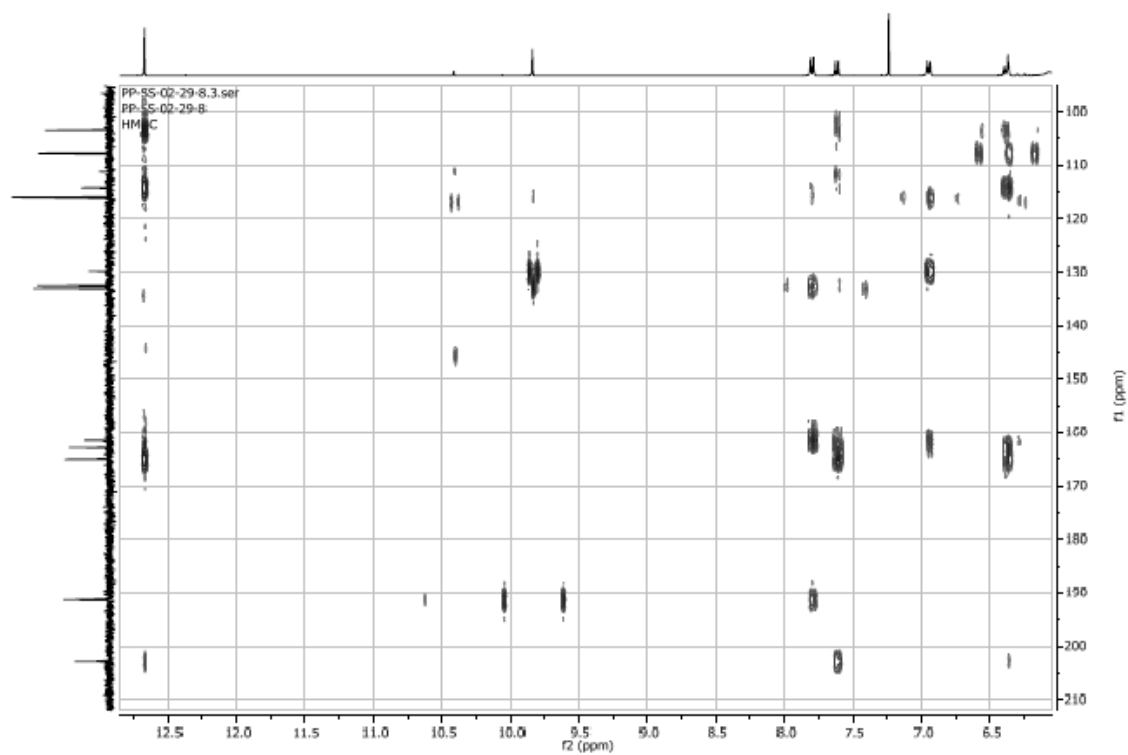

Figure S10: HMBC spectrum of Compound 1
